# Supplementary material for: Comparative Analysis of Viromes Identified in Multiple Macrofungi
Source: MDPI journal article supplement (doi:10.3390/v16040597), 2024-04-12
Supplement: s1 [file s1]

## Supplementary Materials Figures

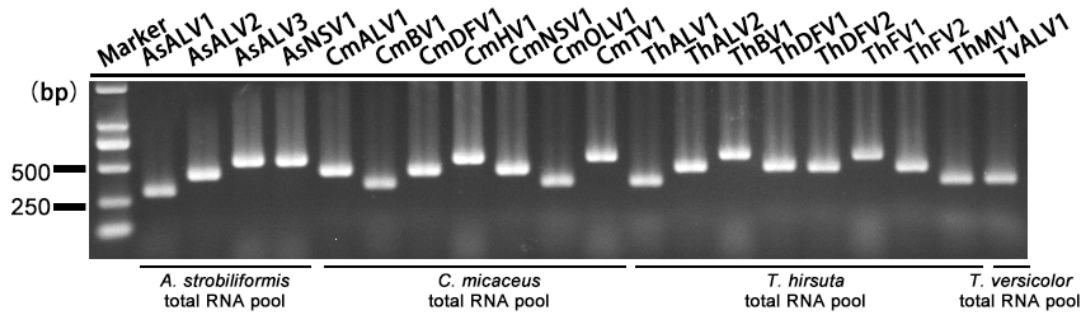

**Figure S1:** PCR confirmation of mycovirus contigs in four total RNA pools of macrofungi strains (including *Amanita strobiliformis*, *Coprinellus micaceus*, *Trametes hirsuta*, and *Trametes versicolor*, respectively). The viral primers were designed according to the contig sequences, and the primers used are listed in Table S3.

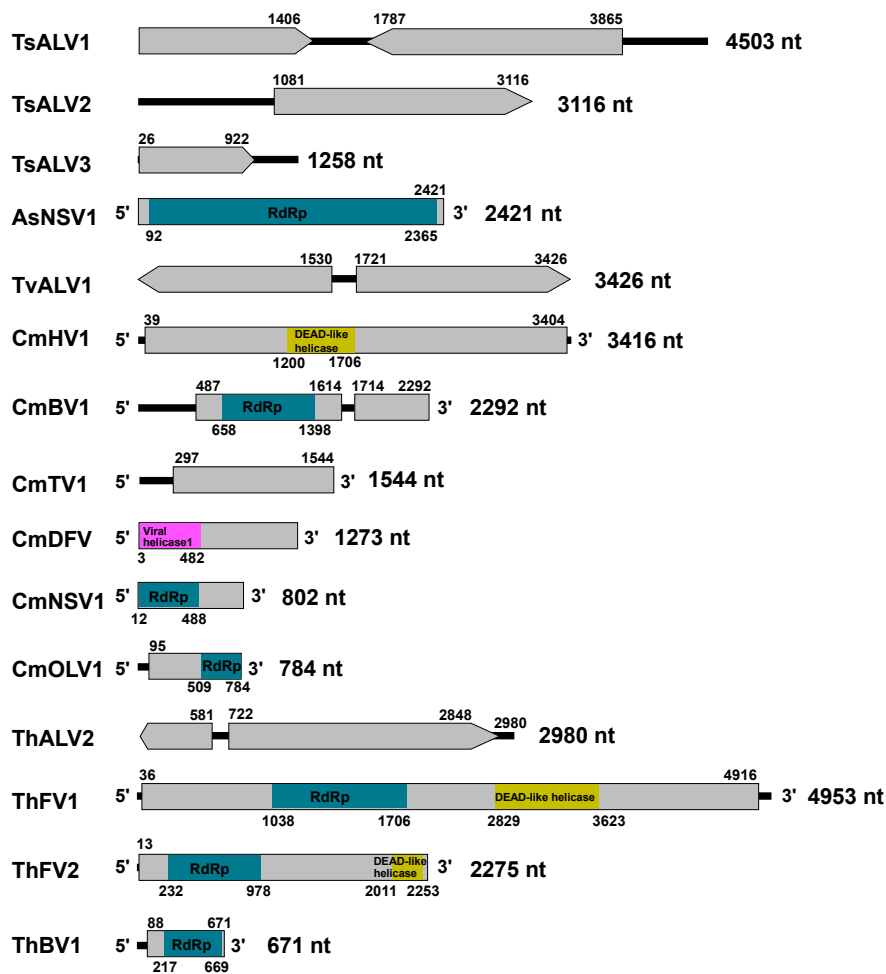

**Figure S2:** A schematic diagram shows the structure of other viral sequences. The conserved domains include RNA-dependent RNA polymerase (RdRp) and viral helicase (Hel), which are indicated on their fragments.

|                              |                                                                |     |
|------------------------------|----------------------------------------------------------------|-----|
| ThMV1                        | RTFWITNNTWEGTQIKDSTLKMISLTNNQTLSESWARTVSYKDKLISYKT--KDQMGFI    | 287 |
| OnuMV1a                      | ----NNTGWLTAIRRLK-----HLFTWGEITSIL----DPYKEGKWEKSDFY           | 230 |
| ShMV                         | -GIWKDIYAWYISPLFPTL---LSF-IGRMNR---GNVL---IDLLRSEVSHWEATGVK    | 251 |
| OnuMV3a                      | -GIWKDIYAWYISPLFPTL---LSF-IGRMNR---GNVL---IDLLRAEVSYWEATGVK    | 250 |
| CcMV2a                       | -TSLLDALAFWSDPLRVIHF--IWF-NIRCYGYFWGLIWSMWLIFIMIISL---PYYLIA   | 73  |
| CpMV1-NB631                  | -TSSVDALSFITQPTKIFTY--LDF-SVRVYKFR-GLLLWMHMMICILLITL---PYAIVS  | 317 |
| <b>I</b>                     |                                                                |     |
| ThMV1                        | NEFIGNGIRMKHKTGKLTSTKEEAAGKVRVFAFMDPFTQWATEPLHRNTFSILKKMETDG   | 347 |
| OnuMV1a                      | SFWASIQPLTDNVPYIGKLAAG-EEPGKVRIFAMVDVAVTQWLLKPLHEAIFKLLNIFAFDG | 289 |
| ShMV                         | ---PSVSP--LELKGKLAKEEAAGKARVFAMADSIQSVMAPLNSWVFSKLGKLPMDG      | 306 |
| OnuMV3a                      | ---PSVSP--LDLKGKLAKEEAAGKARVFAMADSIQSVMAPLNSWVFSKLGKLPMDG      | 305 |
| CcMV2a                       | ---LCLGA--RAPVMGQLATVYDQAGKARIVASTNSWIQCSLFGLHNKIFSLRSPQDG     | 128 |
| CpMV1-NB631                  | ---FHLGA--LIPIMGLSVVYDQAGKARIVASTNSWIQAFYSLHLHVEKLLKNIQDG      | 372 |
| *: *: : *: *: *              |                                                                |     |
| <b>II</b>                    |                                                                |     |
| ThMV1                        | TFNQMKPISRIPW-----GSVPIYSFDTSAATDRTPISTQEDITSILYKDFSGAWRA      | 400 |
| OnuMV1a                      | TFDQIGQLEKFMDRMKD---KAPYYYSFDLSAATDRPLPSIQILILKHLVSVPFSEAWGR   | 346 |
| ShMV                         | TFNQQAPLNRVLQLYKEGLLDHVEFYSDLSAATDRPLMAFQKQIISVLFGSDADDWAT     | 366 |
| OnuMV3a                      | TFNQQAPLNRVLQLYQDGLLDHVEFYSDLSAATDRPLMAFQKQIISVLFGSKFAKWAT     | 365 |
| CcMV2a                       | TFDQNKPFDLLESL-Q---PGYMLYGFDLSAATDRPLIAFQKDI LNHL--GYPGGPWR    | 182 |
| CpMV1-NB631                  | TFDQERPFKLLIKWLE---PTQKFYGFDTAATDRPLIDLQVDILNIIFKNPSSWRS       | 429 |
| *: *: : *: *: *              |                                                                |     |
| <b>III</b>                   |                                                                |     |
| ThMV1                        | TTVDRDYKTPKQSFLDWTFTKGMFVSRYKVGQPMGATSSWAMTAMTHHYMVHYSAWIS     | 460 |
| OnuMV1a                      | LLTGRTYHL-----FYKKTSYEVQYQVQPMGALSSWGLALTHHLVVQYSAYLA          | 396 |
| ShMV                         | LLVGRDWYL-----KDIPYRYSVGQPMGALSSWAHLALSHHVIVQIAA-MR            | 411 |
| OnuMV3a                      | LLVGRDWYL-----KDIPYRYSVGQPMGALSSWAHLALSHHVIVQIAA-MR            | 410 |
| CcMV2a                       | LLG-IKYN-----PCGFISYAVGQPMGAYSSFAHLALTHHVIVQVAA-QK             | 226 |
| CpMV1-NB631                  | LLR-IKYK-----PQGFLTYAVGQPMGAYSSFAHLALTHHVIVQVAA-LN             | 473 |
| : * ***** *: * *: *: *       |                                                                |     |
| <b>IV</b> <b>V</b> <b>VI</b> |                                                                |     |
| ThMV1                        | GVVPIGTKFSQYAVTGDDVVIWNSTVAEAYTKVMQ-DTGVEVGLAKSVTPKKGLEFAK     | 519 |
| OnuMV1a                      | F--GKVNLFKDYIVLGGDIVIGNHEVSIHYHLMTEILKVKINPTKGIHSP--HSLEFAK    | 452 |
| ShMV                         | V--GK-LSFTNYALLGDDIVIAADKAVATSYHMIMTQILGVEINLSKSLVSS--NSFEFAK  | 466 |
| OnuMV3a                      | V--GK-LPFTNYALLGDDIVIAADKAVATSYHMIMTQILGVEINLSKSLVSN--NSFEFAK  | 465 |
| CcMV2a                       | A--GFSDRFTDYCILGDDIVIAANSLVAEAYKSLIF-DLGLSEISKSVISG--TFTEFAK   | 281 |
| CpMV1-NB631                  | S--GFTTRFTDYCILGDDIVIAHDTVASEYKLME-TLGLSISGKSVISS--EFTEFAK     | 528 |
| *: *: : *: *: *              |                                                                |     |
| ThMV1                        | RTTVNGMDVSPMPFKEQMSAHQSTYNM-----RNFCDKYNTSPLAVLRFLGYGYQV       | 570 |
| OnuMV1a                      | RFYVQYQDCSPLSLKEFS-SF-----G---TVYSSFTASLRKLDISVPNL-LTLVGRGGR-  | 502 |
| ShMV                         | RLVTMDGEVSAGAKNLLVALKSRWGISVILDLYNKGLALSEQDLRQR-FSSIPTVSKQ     | 525 |
| OnuMV3a                      | RLVTMDGEVSAGAKNLLVALKSRWGISVILDLYNKGLALSEQDLRQR-FSSIPTVSKQ     | 524 |
| CcMV2a                       | KLRGPLMDISPIGAGLILYSLRNKYICVLVFEILERGLCMWYDVYPQL-LSLLPKIYRR    | 340 |
| CpMV1-NB631                  | KLKGRNFDIFYRSWFSIIHFEKQILHLCTVFELLRRGVCELYDLPQY-INKLPIYLR      | 587 |
| : : : : :                    |                                                                |     |

**Figure S3:** Conserved amino acid sequence motifs of the putative RNA-dependent RNA polymerases of *Trametes hirsuta* mitovirus 1 (ThMV1), *Cryphonectria cubensis* mitovirus 2a (CcMV2a), *Ophiostoma* mitovirus 1a (OnuMV1a), *Sclerotinia homoeocarpa* mitovirus (ShMV), *Ophiostoma* mitovirus 3a (OnuMV3a), and *Cryphonectria parasitica* mitovirus 1-NB631 (CpMV1-NB631). “\*” indicates identical amino acid residues; and “.” indicates low chemically similar amino acid residues.

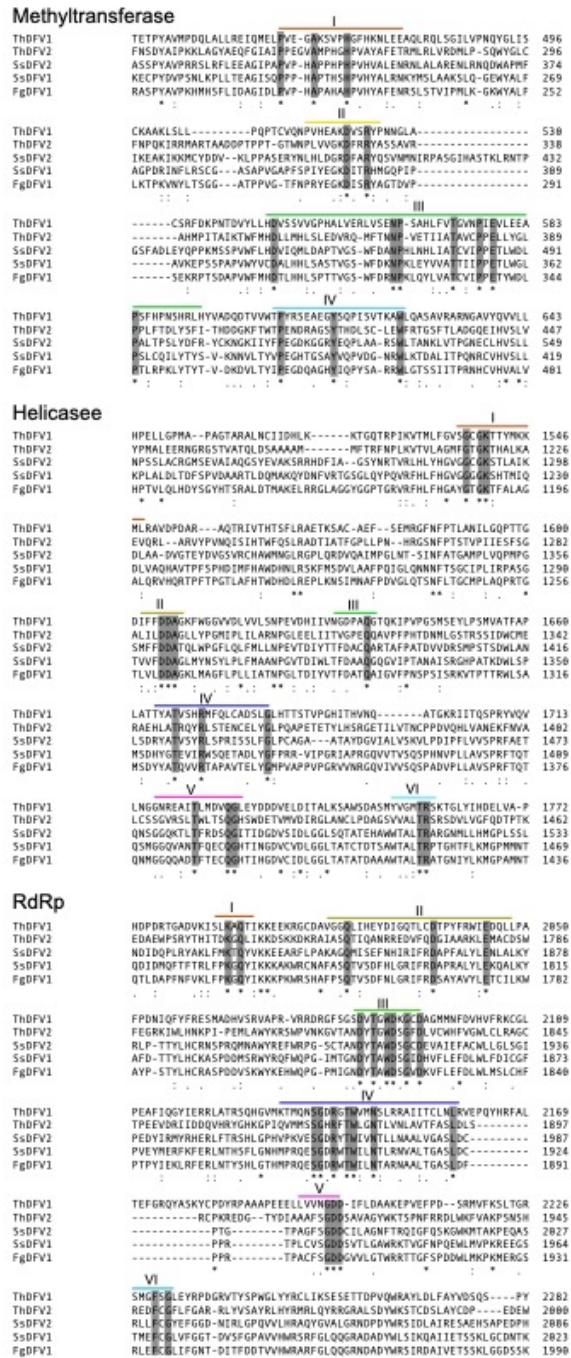

**Figure S4:** Multiple alignment of amino acid sequences of conserved domains including methyltransferase (Mtr), viral RNA Helicase (Hel), and RNA-dependent RNA polymerase (RdRp) domains of *Trametes hirsuta* deltaflexivirus 1 (ThDFV1), ThDFV2, *Sclerotinia sclerotiorum* deltaflexivirus 1 (SsDFV1), *Sclerotinia sclerotiorum* deltaflexivirus 2 (SsDFV2), and *Fusarium graminearum* deltaflexivirus 1 (FgDFV1). “\*” indicates identical amino acid residues, and “.” indicates low chemically similar amino acid residues.

## Supplementary Materials Tables

**Table S1. Macrofungi strains from China used in this study**

| Sample name | Collected data | Location          | Species                    | Total RNA pools       |
|-------------|----------------|-------------------|----------------------------|-----------------------|
| BFS-1       | 2021           | Shizi Mountain    | <i>Trametes versicolor</i> | sequencing library #1 |
| BFS-2       | 2021           | (30° 27' N, 114°  | <i>Trametes versicolor</i> |                       |
| BFS-3       | 2021           | 20' E), Huazhong  | <i>Trametes versicolor</i> |                       |
| BFS-4       | 2021           | Agricultural      | <i>Trametes versicolor</i> |                       |
| BFS-5       | 2021           | University, Wuhan | <i>Trametes versicolor</i> |                       |
| BFS-6       | 2021           | City, Hubei       | <i>Trametes versicolor</i> |                       |
| BFS-7       | 2021           | Province, China   | <i>Trametes versicolor</i> |                       |
| BFS-8       | 2021           |                   | <i>Trametes versicolor</i> |                       |
| BFS-9       | 2021           |                   | <i>Trametes versicolor</i> |                       |
| BFS-10      | 2021           |                   | <i>Trametes versicolor</i> |                       |
| BFS-11      | 2021           |                   | <i>Trametes versicolor</i> |                       |
| BFS-12      | 2021           |                   | <i>Trametes versicolor</i> |                       |
| BFS-13      | 2021           |                   | <i>Trametes versicolor</i> |                       |
| BFS-14      | 2021           |                   | <i>Trametes versicolor</i> |                       |
| BFS-15      | 2021           |                   | <i>Trametes versicolor</i> |                       |
| d-1         | 2021           | Shizi Mountain,   | <i>Trametes hirsuta</i>    | sequencing library #2 |
| d-2         | 2021           | Huazhong          | <i>Trametes hirsuta</i>    |                       |
| d-3         | 2021           | Agricultural      | <i>Trametes hirsuta</i>    |                       |
| d-4         | 2021           | University, Wuhan | <i>Trametes hirsuta</i>    |                       |
| d-5         | 2021           | City, Hubei       | <i>Trametes hirsuta</i>    |                       |
| d-6         | 2021           | Province, China   | <i>Trametes hirsuta</i>    |                       |
| d-7         | 2021           |                   | <i>Trametes hirsuta</i>    |                       |
| d-8         | 2021           |                   | <i>Trametes hirsuta</i>    |                       |
| d-9         | 2021           |                   | <i>Trametes hirsuta</i>    |                       |
| d-10        | 2021           |                   | <i>Trametes hirsuta</i>    |                       |
| d-11        | 2021           |                   | <i>Trametes hirsute</i>    |                       |
| d-12        | 2021           |                   | <i>Trametes hirsuta</i>    |                       |

|       |      |                   |                               |                       |
|-------|------|-------------------|-------------------------------|-----------------------|
| d-13  | 2021 |                   | <i>Trametes hirsuta</i>       |                       |
| d-14  | 2021 |                   | <i>Trametes hirsuta</i>       |                       |
| d-15  | 2021 |                   | <i>Trametes hirsuta</i>       |                       |
| d-16  | 2021 |                   | <i>Trametes hirsuta</i>       |                       |
| d-17  | 2021 |                   | <i>Trametes hirsuta</i>       |                       |
| d-18  | 2021 |                   | <i>Trametes hirsuta</i>       |                       |
| d-19  | 2021 |                   | <i>Trametes hirsuta</i>       |                       |
| d-20  | 2021 |                   | <i>Trametes hirsuta</i>       |                       |
| DS-1  | 2021 | Shizi Mountain,   | <i>Amanita strobiliformis</i> | sequencing library #3 |
| DS-2  | 2021 | Huazhong          | <i>Amanita strobiliformis</i> |                       |
| DS-3  | 2021 | Agricultural      | <i>Amanita strobiliformis</i> |                       |
| DS-4  | 2021 | University, Wuhan | <i>Amanita strobiliformis</i> |                       |
| DS-5  | 2021 | City, Hubei       | <i>Amanita strobiliformis</i> |                       |
| DS-6  | 2021 | Province, China   | <i>Amanita strobiliformis</i> |                       |
| DS-7  | 2021 |                   | <i>Amanita strobiliformis</i> |                       |
| DS-8  | 2021 |                   | <i>Amanita strobiliformis</i> |                       |
| DS-9  | 2021 |                   | <i>Amanita strobiliformis</i> |                       |
| DS-10 | 2021 |                   | <i>Amanita strobiliformis</i> |                       |
| DS-11 | 2021 |                   | <i>Amanita strobiliformis</i> |                       |
| DS-12 | 2021 |                   | <i>Amanita strobiliformis</i> |                       |
| DS-13 | 2021 |                   | <i>Amanita strobiliformis</i> |                       |
| DS-14 | 2021 |                   | <i>Amanita strobiliformis</i> |                       |
| DS-15 | 2021 |                   | <i>Amanita strobiliformis</i> |                       |
| G-1   | 2021 | Shizi Mountain,   | <i>Coprinellus micaceus</i>   | sequencing library #4 |
| G-2   | 2021 | Huazhong          | <i>Coprinellus micaceus</i>   |                       |
| G-3   | 2021 | Agricultural      | <i>Coprinellus micaceus</i>   |                       |
| G-4   | 2021 | University, Wuhan | <i>Coprinellus micaceus</i>   |                       |
| G-5   | 2021 | Province, Hubei   | <i>Coprinellus micaceus</i>   |                       |
| G-6   | 2021 | Province, China   | <i>Coprinellus micaceus</i>   |                       |
| G-7   | 2021 |                   | <i>Coprinellus micaceus</i>   |                       |
| G-8   | 2021 |                   | <i>Coprinellus micaceus</i>   |                       |
| G-9   | 2021 |                   | <i>Coprinellus micaceus</i>   |                       |

|      |      |  |                             |  |
|------|------|--|-----------------------------|--|
| G-10 | 2021 |  | <i>Coprinellus micaceus</i> |  |
| G-11 | 2021 |  | <i>Coprinellus micaceus</i> |  |
| G-12 | 2021 |  | <i>Coprinellus micaceus</i> |  |
| G-13 | 2021 |  | <i>Coprinellus micaceus</i> |  |
| G-14 | 2021 |  | <i>Coprinellus micaceus</i> |  |
| G-15 | 2021 |  | <i>Coprinellus micaceus</i> |  |
| G-16 | 2021 |  | <i>Coprinellus micaceus</i> |  |
| G-17 | 2021 |  | <i>Coprinellus micaceus</i> |  |
| G-18 | 2021 |  | <i>Coprinellus micaceus</i> |  |
| G-19 | 2021 |  | <i>Coprinellus micaceus</i> |  |
| G-20 | 2021 |  | <i>Coprinellus micaceus</i> |  |
| G-21 | 2021 |  | <i>Coprinellus micaceus</i> |  |
| G-22 | 2021 |  | <i>Coprinellus micaceus</i> |  |
| G-23 | 2021 |  | <i>Coprinellus micaceus</i> |  |
| G-24 | 2021 |  | <i>Coprinellus micaceus</i> |  |
| G-25 | 2021 |  | <i>Coprinellus micaceus</i> |  |
| G-26 | 2021 |  | <i>Coprinellus micaceus</i> |  |
| G-27 | 2021 |  | <i>Coprinellus micaceus</i> |  |
| G-28 | 2021 |  | <i>Coprinellus micaceus</i> |  |
| G-29 | 2021 |  | <i>Coprinellus micaceus</i> |  |
| G-30 | 2021 |  | <i>Coprinellus micaceus</i> |  |
| G-31 | 2021 |  | <i>Coprinellus micaceus</i> |  |
| G-32 | 2021 |  | <i>Coprinellus micaceus</i> |  |
| G-33 | 2021 |  | <i>Coprinellus micaceus</i> |  |
| G-34 | 2021 |  | <i>Coprinellus micaceus</i> |  |
| G-35 | 2021 |  | <i>Coprinellus micaceus</i> |  |
| G-36 | 2021 |  | <i>Coprinellus micaceus</i> |  |
| G-37 | 2021 |  | <i>Coprinellus micaceus</i> |  |
| G-38 | 2021 |  | <i>Coprinellus micaceus</i> |  |
| G-39 | 2021 |  | <i>Coprinellus micaceus</i> |  |
| G-40 | 2021 |  | <i>Coprinellus micaceus</i> |  |

**Table S2 The blastp, PCR confirmation and reads of mycovirus contigs in four species of macrofungi**

| <b>Short name<br/>(Viral contigs)</b> | <b>Viral reads</b> | <b>Host strains</b>                       | <b>Best match</b>                                     | <b>E-values</b> | <b>Query<br/>cover</b> |
|---------------------------------------|--------------------|-------------------------------------------|-------------------------------------------------------|-----------------|------------------------|
| AsALV1                                | 17777              | DS-1, DS-3, DS-4, DS-5, DS-9, DS-10       | Phlebiopsis gigantea ambi-like virus 1                | 2e-104          | 36%                    |
| AsALV2                                | 9839               | DS-1, DS-2, DS-8, DS-14                   | Rhizoctonia solani ambivirus 1                        | 3e-91           | 56%                    |
| AsALV3                                | 4353               | DS-6, DS-15                               | Tulasnella ambivirus 2                                | 2e-14           | 63%                    |
| AsNSV1                                | 22938              | DS-1, DS-2, DS-4, DS-5, DS-14             | Soybean leaf-associated negative-stranded RNA virus 4 | 3e-116          | 96%                    |
| CmALV1                                | 958                | G-2, G-20                                 | Tulasnella ambivirus 5                                | 4e-123          | 37%                    |
| CmBV1                                 | 288                | G-3                                       | Sclerotinia sclerotiorum barnavirus 1                 | 8e-48           | 45%                    |
| CmDFV1                                | 96                 | G-1                                       | Pestalotiopsis deltaflexivirus 1                      | 5e-57           | 54%                    |
| CmHV1                                 | 357                | G-2, G-15, G-35                           | Rhizoctonia cerealis hypovirus                        | 5e-173          | 74%                    |
| CmNSV1                                | 50                 | G-36                                      | Phytophthora condilina negative stranded RNA virus 2  | 3e-24           | 62%                    |
| CmOLV1                                | 23                 | G-11                                      | Armillaria mellea ourmia-like virus 1                 | 2e-61           | 99%                    |
| CmTV1                                 | 110                | G-14                                      | Rhizoctonia solani toti-like virus 1                  | 5e-144          | 98%                    |
| ThALV1                                | 1755               | d-5, d-8, d-16, d-17                      | Fusarium graminearum ambivirus 1                      | 5e-82           | 44%                    |
| ThALV2                                | 345                | d-1, d-3                                  | Downy mildew lesion associated ambivirus 2            | 9e-59           | 63%                    |
| ThBV1                                 | 11                 | d-1                                       | Bemisia tabaci beny-like virus 3                      | 1e-41           | 99%                    |
| ThDFV1                                | 7023               | d-1, d-2, d-3, d-16                       | Lentinula edodes deltaflexivirus 1                    | 0.0             | 75%                    |
| ThDFV2                                | 3494               | d-10, d-13, d-17                          | Cat Tien Macrotermes Deltaflexi-like virus            | 7e-106          | 32%                    |
| ThFV1                                 | 414                | d-3, d-9                                  | Phlebiopsis gigantea fusarivirus 1                    | 0.0             | 70%                    |
| ThFV2                                 | 221                | d-7                                       | Sclerotium rolfsii fusarivirus 2                      | 0.0             | 99%                    |
| ThMV1                                 | 7199               | d-1, d-2, d-4, d-5, d-7, d-13, d-16, d-20 | Lentinula edodes mitovirus 1                          | 0.0             | 57%                    |
| TvALV1                                | 3201               | BFS-2, BFS-3, BFS-14                      | Heterobasidion ambi-like virus 15                     | 2e-94           | 46%                    |

**Table S3 Primers used to detect viral contigs**

| Name of primers | Sequence from 5' to 3'     | Lengths of PCR products (bp) |
|-----------------|----------------------------|------------------------------|
| AsALV1-f        | GAGAGAAAGAGCCATTGTG        | 300                          |
| AsALV1-r        | GCCTATGGGGCGGTGTATT        |                              |
| AsALV2-f        | GACGCATGACTGCTTGTCCTG      | 400                          |
| AsALV2-r        | ATGCAAGTTGATACTACCGC       |                              |
| AsALV3-f        | GGGTCAGCCATTTGTGGCTCC      | 510                          |
| AsALV3-r        | CACAACATTTTGCCTGATTGG      |                              |
| ASNSV1-f        | GTGCCTTGATACTCAAGCACCG     | 510                          |
| ASNSV1-r        | CGGAGAACGGACCTGACTTCACG    |                              |
| CmALV1-f        | TGGTCATCTCGGGCTATGGGAA     | 410                          |
| CmALV1-r        | GAGGAACTCGAGCGTCAGGCTA     |                              |
| CmBV1-f         | TACCCTCGAAACAAGAACCTGC     | 320                          |
| CmBV1-r         | AGACGCTGCCTCTCGGTTCTCTC    |                              |
| CmDFV1-f        | ATGCGCGGAAGACGATGAGT       | 410                          |
| CmDFV1-r        | GGCAAGACGACGAAGATATTGGAGAT |                              |
| CmHV1-f         | TGTGTCTTTTAGAGAGTGGTTAA    | 511                          |
| CmHV1-r         | GCTCTATCTATGGCTCGCATGA     |                              |
| CmNSV1-f        | CTGATGATAAAAATGAGTTATTC    | 413                          |
| CmNSV1-r        | GTGAGGTGAGTCTCTGAAACCA     |                              |
| CmOLV1-f        | CCAATAAGGAGCTAGCGAGAA      | 338                          |
| CmOLV1-r        | GCAACCCTTCCCTGAGTTTG       |                              |
| CmTV1-f         | CATTGAGTGGATGAAATGGCATG    | 527                          |
| CmTV1-r         | CTGCTTGTTTACTGGGCTGTAGA    |                              |
| ThALV1-f        | ACAACTCGTAGGCAACCTCC       | 338                          |
| ThALV1-r        | TAAATGATAAAGAGCAACACA      |                              |
| ThALV2-f        | CTCCGACCGCTCGATGAGG        | 455                          |
| ThALV2-r        | TCTGACAACCACACTCCAACCAC    |                              |
| ThBV1-f         | GGTTCGTCAGGCAGAGGGCC       | 526                          |
| ThBV1-r         | GATGGACCTCGGACACGATA       |                              |
| ThDFV1-f        | GCAGAAGAGGTCTGAACAACGG     | 455                          |
| ThDFV1-r        | GAGTGACGCGAGCGGAGCCTGG     |                              |
| ThDFV2-f        | GCAGCTTTCTGCTTGCGTAC       | 454                          |
| ThDFV2-r        | CGGTGAGCAGTGTCCGAAAACAT    |                              |
| ThFV1-f         | AGGGCTGGTTCTTGCTTGGGTA     | 546                          |
| ThFV1-r         | CCTCTTTAGAGGCAGTGGGTA      |                              |
| ThFV2-f         | TGCTTTTGTATAGATGCAAACTA    | 506                          |
| ThFV2-r         | TTGACCGGGTCGTGATAGACAA     |                              |
| ThMV1-f         | AAACAATAAGACCACTAGAATCT    | 329                          |
| ThMV1-r         | GATTACTCTAACCTCTATTATTTT   |                              |
| TvALV1-f        | TGCGGAAAGTGTGGATTCAATG     | 330                          |
| TvALV1-r        | TACAACTCACACGATGATGCGCT    |                              |
